# Supplementary material for: Histamine-2 receptor antagonist famotidine modulates cardiac stem cell characteristics in hypertensive heart disease
Source: PubMed Central journal article supplement (PMC5637875; doi:10.7717/peerj.3882), 2017-10-09
Supplement: peerj-05-3882-s001.pdf [file peerj-05-3882-s001.pdf]

WISTAR

growth kin

|    | *104 |     | mean | sd       |          |    |
|----|------|-----|------|----------|----------|----|
| 0  | 1    | 1   | 1    | 1        | 0        | 0  |
| 2  | 19   | 23  | 25   | 22.33333 | 3.05505  | 2  |
| 4  | 29   | 41  | 50   | 40       | 10.53565 | 4  |
| 6  | 56   | 65  | 71   | 64       | 7.549834 | 6  |
| 8  | 75   | 86  | 98   | 86.33333 | 11.50362 | 8  |
| 10 | 126  | 139 | 113  | 126      | 13       | 10 |

|     |       |       |       |          |
|-----|-------|-------|-------|----------|
| PDT | 1.433 | 1.405 | 1.466 | 1.434667 |
| GR  | 0.494 | 0.473 | 0.484 | 0.483667 |

SHR CONTROL

|    | *104 |    | mean | sd       |          |      |
|----|------|----|------|----------|----------|------|
| 0  | 1    | 1  | 1    | 1        | 0        |      |
| 2  | 14   | 20 | 15   | 16.33333 | 3.21455  |      |
| 4  | 22   | 19 | 25   | 22       | 3        |      |
| 6  | 27   | 35 | 30   | 30.66667 | 4.041452 | mean |
| 8  | 42   | 51 | 39   | 44       | 6.244998 | sd   |
| 10 | 71   | 67 | 78   | 72       | 5.567764 |      |

|     |       |       |       |          |          |
|-----|-------|-------|-------|----------|----------|
| pdt | 1.63  | 1.65  | 1.59  | 1.623333 | 0.030551 |
| gr  | 0.426 | 0.421 | 0.436 | 0.427667 | 0.007638 |

SHR Treated

|    | *104 |     | mean | sd       |          |  |
|----|------|-----|------|----------|----------|--|
| 0  | 1    | 1   | 1    | 1        | 0        |  |
| 2  | 15   | 22  | 11   | 16       | 5.567764 |  |
| 4  | 29   | 33  | 44   | 35.33333 | 7.767453 |  |
| 6  | 46   | 52  | 39   | 45.66667 | 6.506407 |  |
| 8  | 79   | 66  | 81   | 75.33333 | 8.144528 |  |
| 10 | 111  | 121 | 107  | 113      | 7.211103 |  |

|     |       |      |       |          |          |
|-----|-------|------|-------|----------|----------|
| pdt | 1.47  | 1.45 | 1.48  | 1.466667 | 0.015275 |
| gr  | 0.471 | 0.48 | 0.467 | 0.472667 | 0.006658 |

mean  
sd

CFU

|      | WST         | SHR         | Treated     |
|------|-------------|-------------|-------------|
|      |             | 99          | 45          |
|      |             | 87          | 62          |
|      |             | 82          | 59          |
| mean | 89.33333333 | 55.33333333 | 78          |
| sd   | 8.736894948 | 9.073771726 | 9.539392014 |

CFU

|         |          |
|---------|----------|
| WST     | 89.33333 |
| SHR     | 55.33333 |
| Treated | 78       |

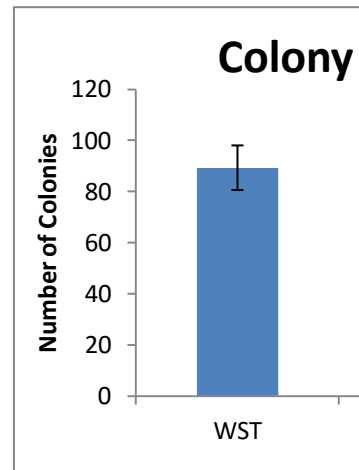

Senescent assay

|      | WST         | SHR         | Treated     |
|------|-------------|-------------|-------------|
|      |             | 1.5         | 3.5         |
|      |             | 0.6         | 2.6         |
|      |             | 1.2         | 3           |
| mean | 1.1         | 3.033333333 | 1.566666667 |
| sd   | 0.458257569 | 0.450924975 | 0.585946528 |

Senescent assay

|         |          |
|---------|----------|
| WST     | 1.1      |
| SHR     | 3.033333 |
| Treated | 1.566667 |

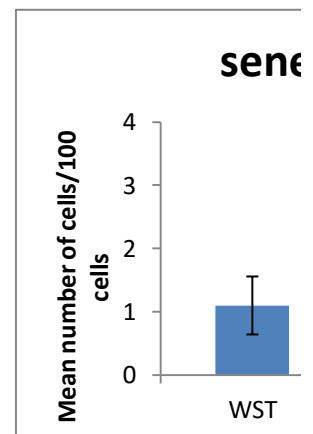

Migration Assay

|      | WST         | SHR | Treated     |             |
|------|-------------|-----|-------------|-------------|
|      |             | 79  | 43          | 71          |
|      |             | 87  | 49          | 59          |
|      |             | 62  | 51          | 66          |
| mean |             | 76  | 47.66666667 | 65.33333333 |
| sd   | 12.76714533 |     | 4.163331999 | 6.027713773 |

|         |          |
|---------|----------|
| WST     | 76       |
| SHR     | 47.66667 |
| Treated | 65.33333 |

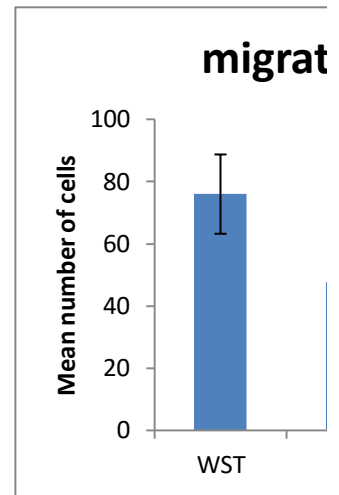

|      | DCFDA       | SHR         | Treated     |  |
|------|-------------|-------------|-------------|--|
|      | 134         | 231         | 172         |  |
|      | 157         | 243         | 156         |  |
|      | 145         | 199         | 160         |  |
| mean | 145.3333333 | 224.3333333 | 162.6666667 |  |
| sd   | 11.50362262 | 22.74496281 | 8.326663998 |  |

| DCFDA   |          |
|---------|----------|
| WST     | 145.3333 |
| SHR     | 224.3333 |
| Treated | 171      |

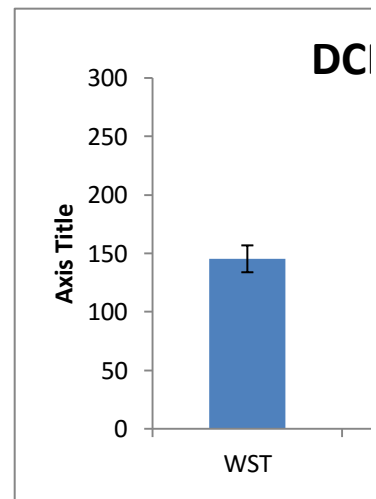

etics

| WST       | SHR       | Treated     |     |
|-----------|-----------|-------------|-----|
| 1         | 1         | 1           | 1   |
| 22.333333 | 16.333333 |             | 16  |
| 40        | 22        | 35.33333333 |     |
| 64        | 30.666667 | 45.66666667 |     |
| 86.333333 | 44        | 75.33333333 |     |
| 126       | 72        |             | 113 |

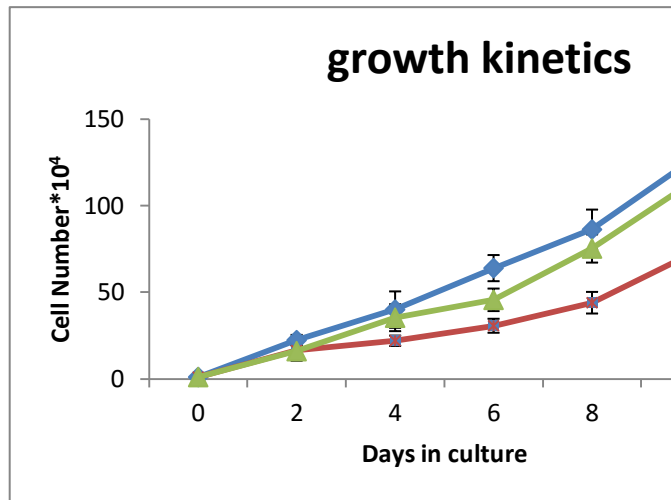

pdt

| wst      | shr      | Treated     | t test                    |
|----------|----------|-------------|---------------------------|
| 1.433    | 1.63     | 1.47        | PDT wst/shr               |
| 1.405    | 1.65     | 1.45        | WST shr/treated           |
| 1.466    | 1.59     | 1.48        | SHR wst/treated           |
| 1.434667 | 1.623333 | 1.46666667  | Treated 1.466667 0.025534 |
| 0.030534 | 0.030551 | 0.015275252 | ANOVA p<0.01              |

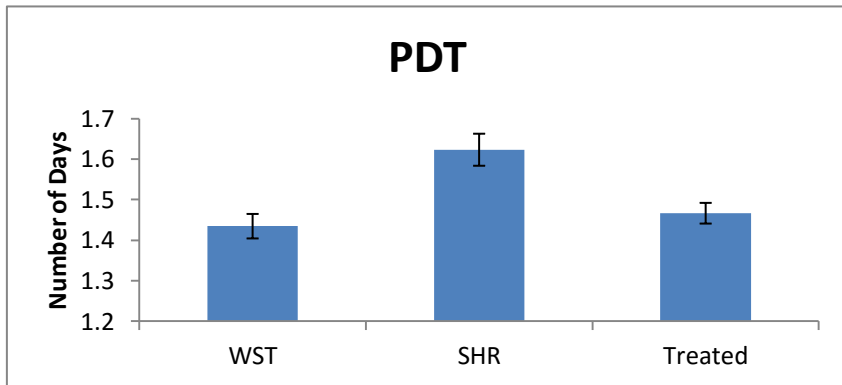

gr

| wst      | shr      | Tempol      | gr      | t test                        |
|----------|----------|-------------|---------|-------------------------------|
| 0.494    | 0.426    | 0.471       | WST     | 0.483667 0.010504 wst/shr     |
| 0.473    | 0.421    | 0.48        | SHR     | 0.427667 0.007638 shr/treated |
| 0.484    | 0.436    | 0.467       | Treated | 0.472667 0.006658 wst/treated |
| 0.483667 | 0.427667 | 0.472666667 |         |                               |
| 0.010504 | 0.007638 | 0.006658328 |         | ANOVA p<0.01                  |

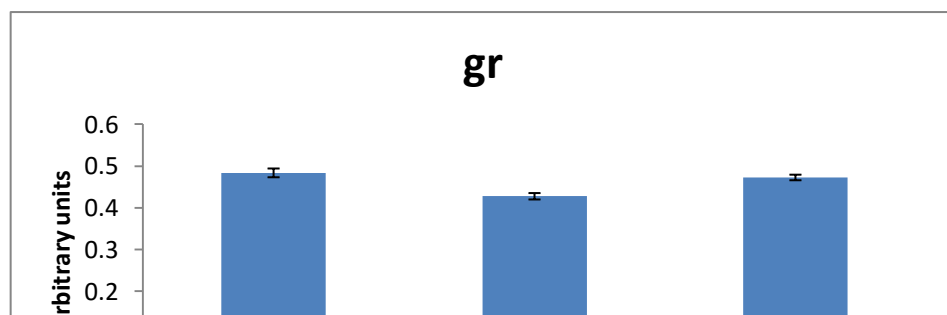

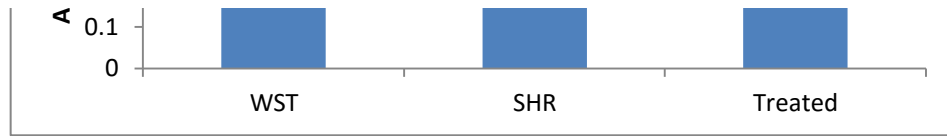

CFU

t test

|          |             |                |
|----------|-------------|----------------|
| 8.736895 | wst/shr     | 0.009481789 ** |
| 9.073772 | shr/treated | 0.040658463 #  |
| 9.539392 | wst/treated | 0.203745471    |

ANOVA  $p < 0.01$

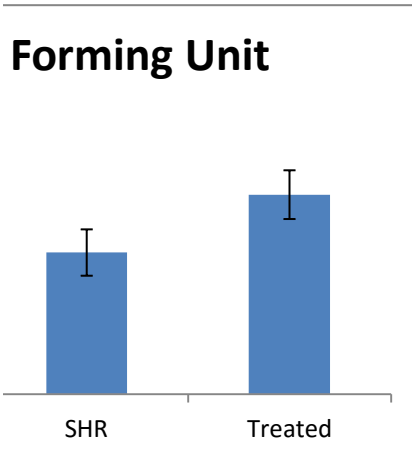

Senescent assay

t test

|          |             |             |
|----------|-------------|-------------|
| 0.458258 | wst/shr     | 0.006478 ** |
| 0.450925 | shr/treated | 0.026394 #  |
| 0.585947 | wst/treated | 0.338307    |

ANOVA  $p < 0.01$

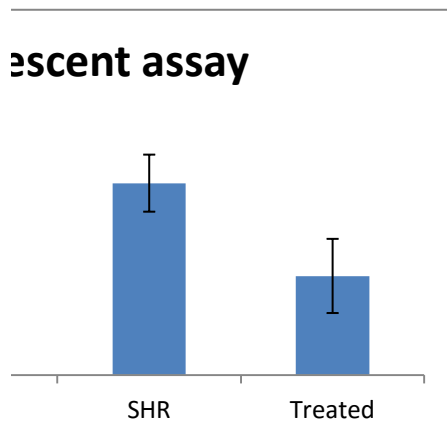

Migration Assay

t test

|          |             |               |
|----------|-------------|---------------|
| 12.76715 | wst/shr     | 0.021686432 * |
| 4.163332 | shr/treated | 0.013952224 # |
| 6.027714 | wst/treated | 0.260799105   |

ANOVA  $p < 0.01$

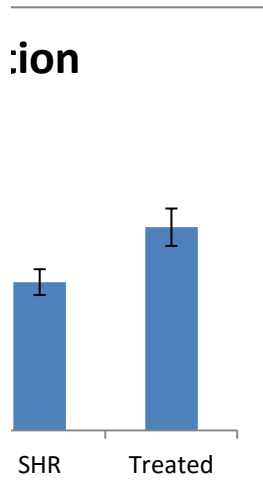

|          |             |                |
|----------|-------------|----------------|
|          | DCFDA       |                |
|          | t test      |                |
| 11.50362 | wst/shr     | 0.005813654 ** |
| 22.74496 | shr/treated | 0.01160274 #   |
| 9.539392 | wst/treated | 0.102017814    |

ANOVA  $p < 0.01$

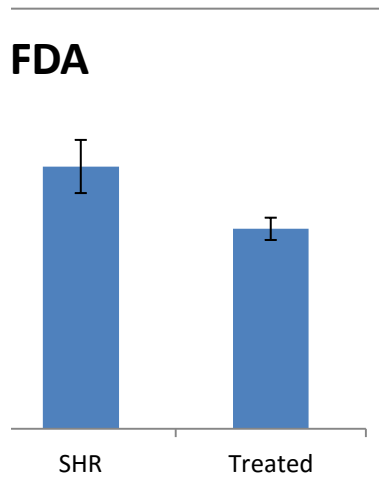

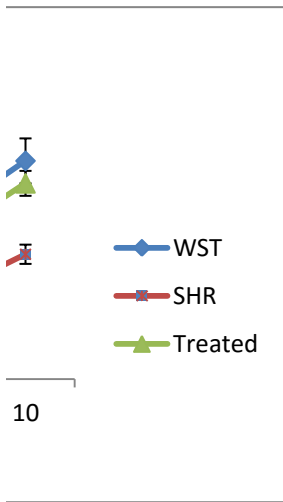

0.001636 \*\*  
 0.001359 ##  
 0.179828

0.001718 \*\*  
 0.001536 ##  
 0.200288

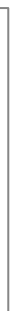

]
